# Supplementary material for: Ion channel gating in cardiac ryanodine receptors from the arrhythmic RyR2-P2328S mouse
Source: J Cell Sci. 2019 May 21;132(10):jcs229039. doi: 10.1242/jcs.229039 (PMC6550012; doi:10.1242/jcs.229039)
Supplement: Supplementary information [file joces-132-229039-s1.pdf]

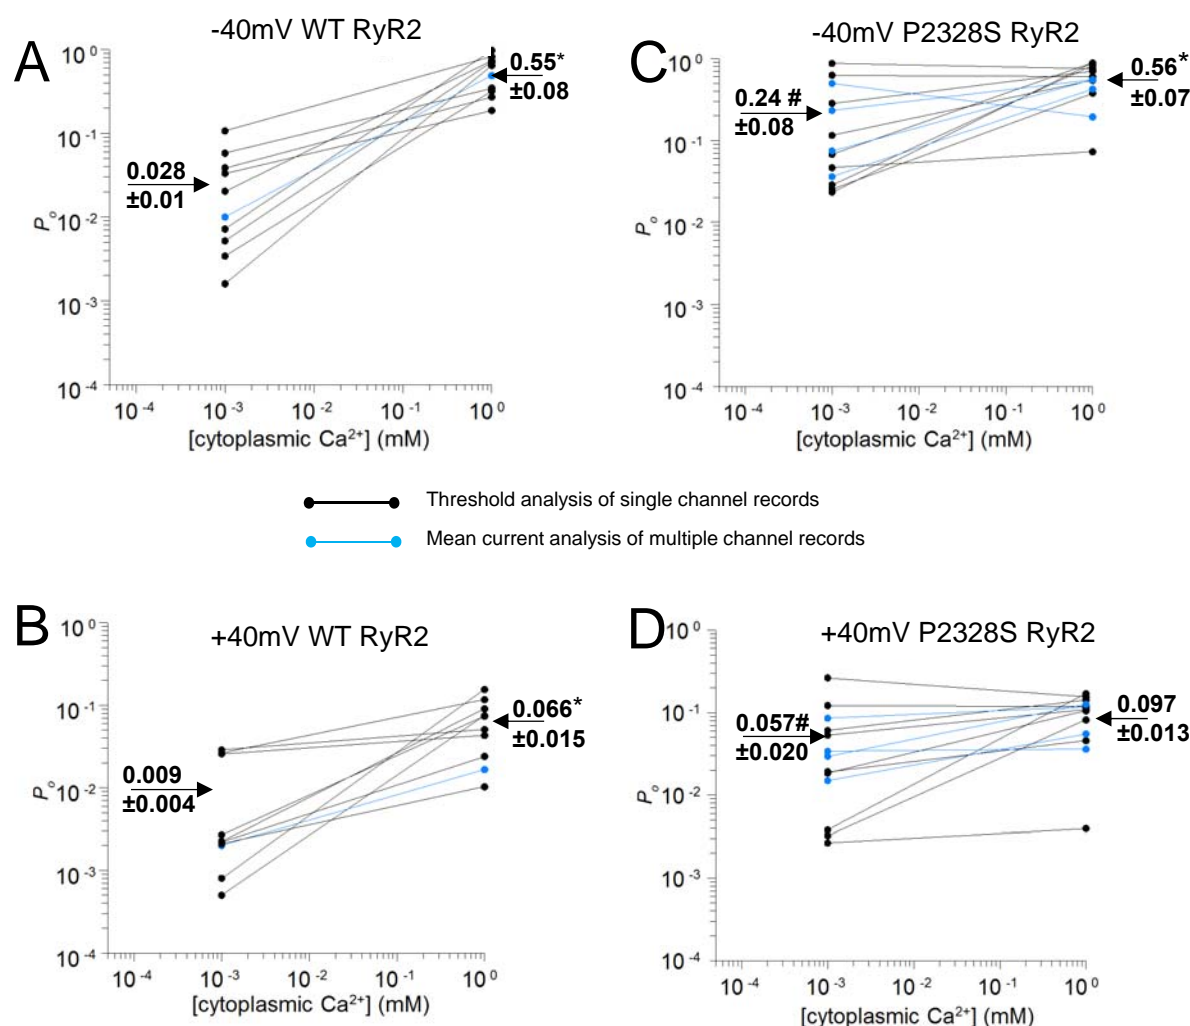

**Figure S1.  $P_o$  of individual channels at 1  $\mu$ M and 1 mM cytoplasmic  $[Ca^{2+}]$  plotted on a logarithmic scale to reveal the spread of data at 1  $\mu$ M cytoplasmic  $[Ca^{2+}]$ .** (A) and (B) show data for WT channels. (C) and (D) show data for P2328S RyR2 channels.  $P_o$  values for recordings at -40 mV are shown in (A) and (C), while  $P_o$  values for recordings at +40 mV are shown in (B) and (D). The black lines link  $P_o$  measurements from bilayers having one active channel, where  $P_o$  was determined using the threshold discriminator method. The blue lines link measurements obtained from bilayers with more than one channel opening at the same time, where  $P_o$  is derived from  $I'_F$  (mean current normalized to maximum current, as described in the Methods). In (A) – (D), average values for  $P_o$  at 1  $\mu$ M cytoplasmic  $Ca^{2+}$  are shown to the left of the data points and average values for  $P_o$  at 1 mM cytoplasmic  $Ca^{2+}$  are shown to the right of the data points. The asterisk (\*) indicates a significant difference between average  $P_o$  at 1  $\mu$ M  $Ca^{2+}$  and at 1 mM  $Ca^{2+}$ . The # symbol indicates a significant difference between average  $P_o$  of WT and P2328S RyR2 channels.

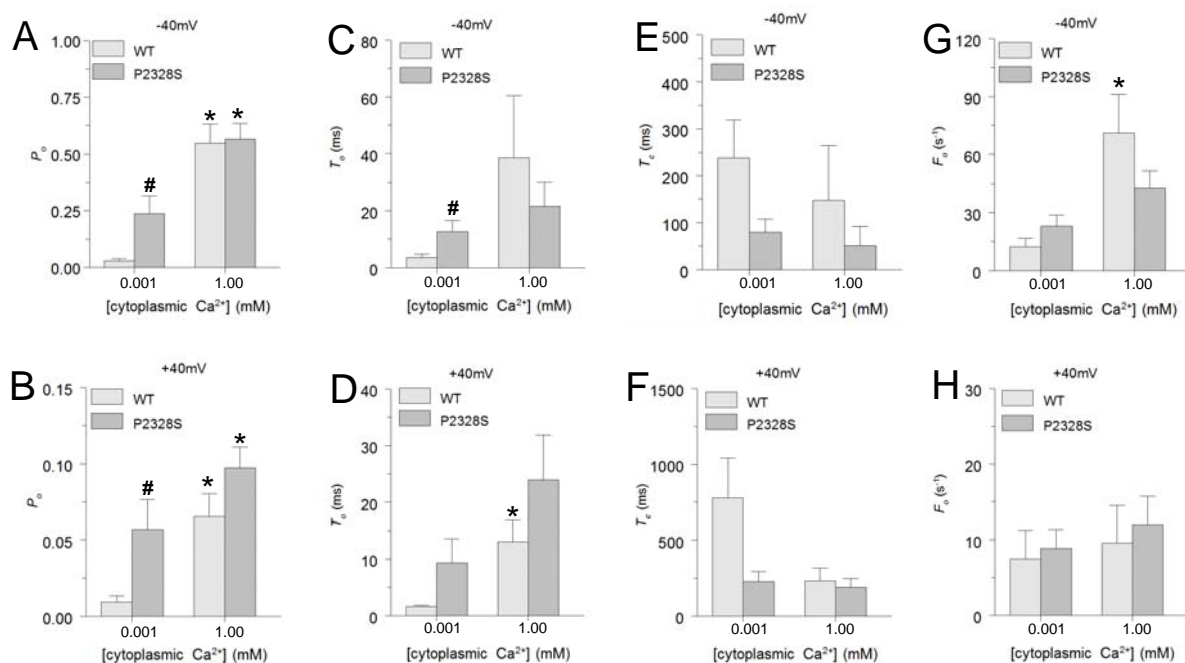

**Figure S2. Average gating parameters of WT and P2328S RyR2 channels exposed to 1 μM and 1 mM cytoplasmic Ca<sup>2+</sup> at -40 mV and at +40 mV.** Average data is compared for WT (light grey bars) and P2328S RyR2 (dark grey bars).

(A), (C), (E) and (G) show average values at -40 mV for P<sub>o</sub> (WT n = 10; P2328S n=13), T<sub>o</sub> (WT n = 8; P2328S n=9), T<sub>c</sub> (WT n = 9; P2328S n=10) and F<sub>o</sub> (WT n = 9; P2328S n=10), respectively. (B), (D), (F) and (H) show average values, at +40 for P<sub>o</sub> (WT n = 10; P2328S n=13), T<sub>o</sub> (WT n = 9; P2328S n=10), T<sub>c</sub> (WT n = 9; P2328S n=10) and F<sub>o</sub> (WT n = 9; P2328S n=10), respectively. Data is presented as mean ± SEM. The asterisk (\*) indicates a significant difference between average data at 1 μM Ca<sup>2+</sup> and at 1 mM Ca<sup>2+</sup>. The # symbol indicates a significant difference between average data for WT and P2328S channels

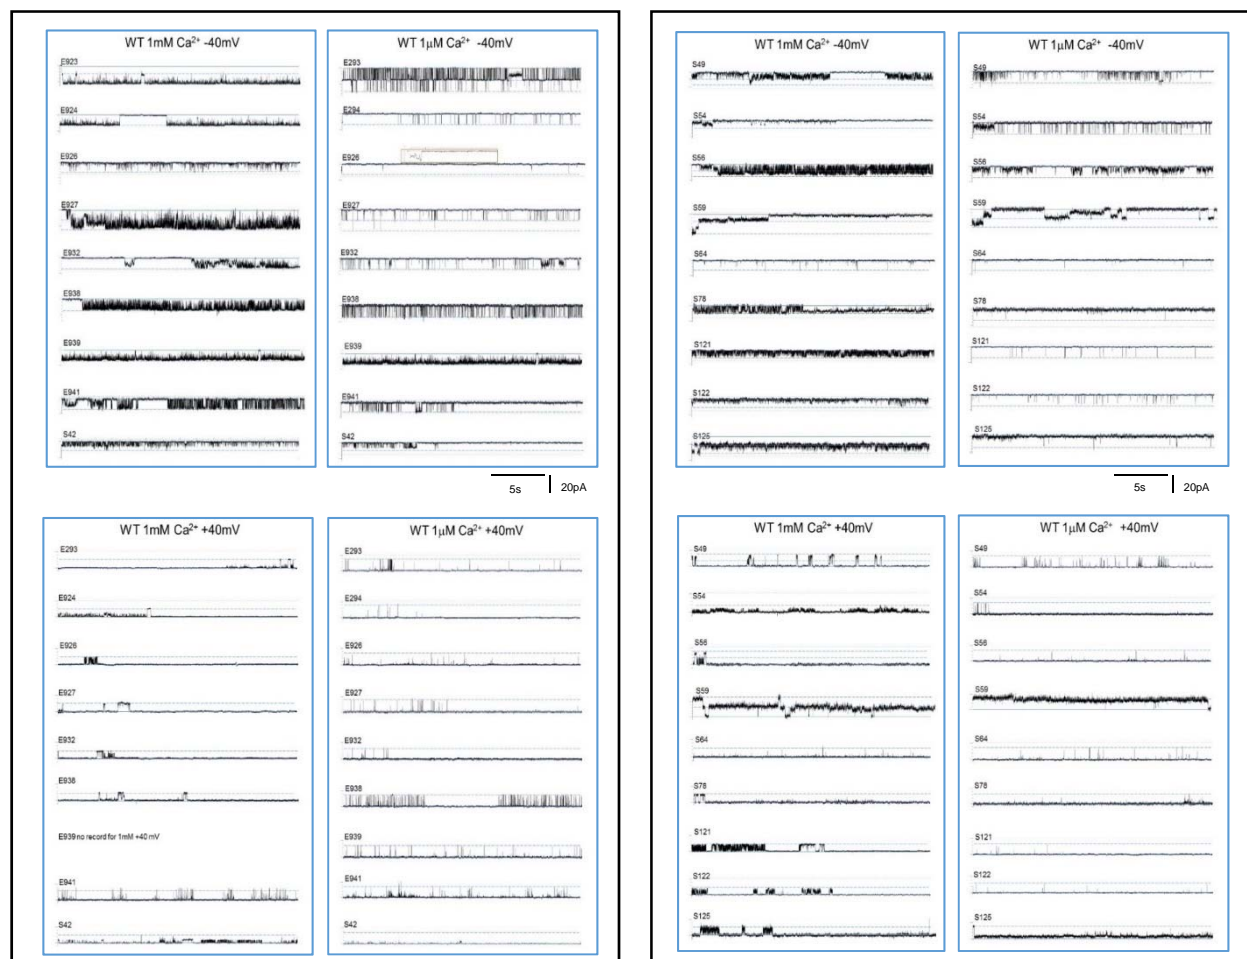

**Figure S3. Examples of currents recorded from 18 WT channels used for analyses of channel activity with 1 mM and 1  $\mu\text{M}$  cytoplasmic  $\text{Ca}^{2+}$  presented in manuscript Figures 1 to 6.** In each panel, records from the same channel are aligned horizontally to allow direct comparisons of the channel activity under each condition. Currents shown on the left hand side of each panel were recorded with 1 mM cytoplasmic  $\text{Ca}^{2+}$ , while those on the right hand side were recorded with 1  $\mu\text{M}$  cytoplasmic  $\text{Ca}^{2+}$ . Currents shown on the top half of each panel were recorded at -40 mV, while those in the lower half were recorded at +40 mV.

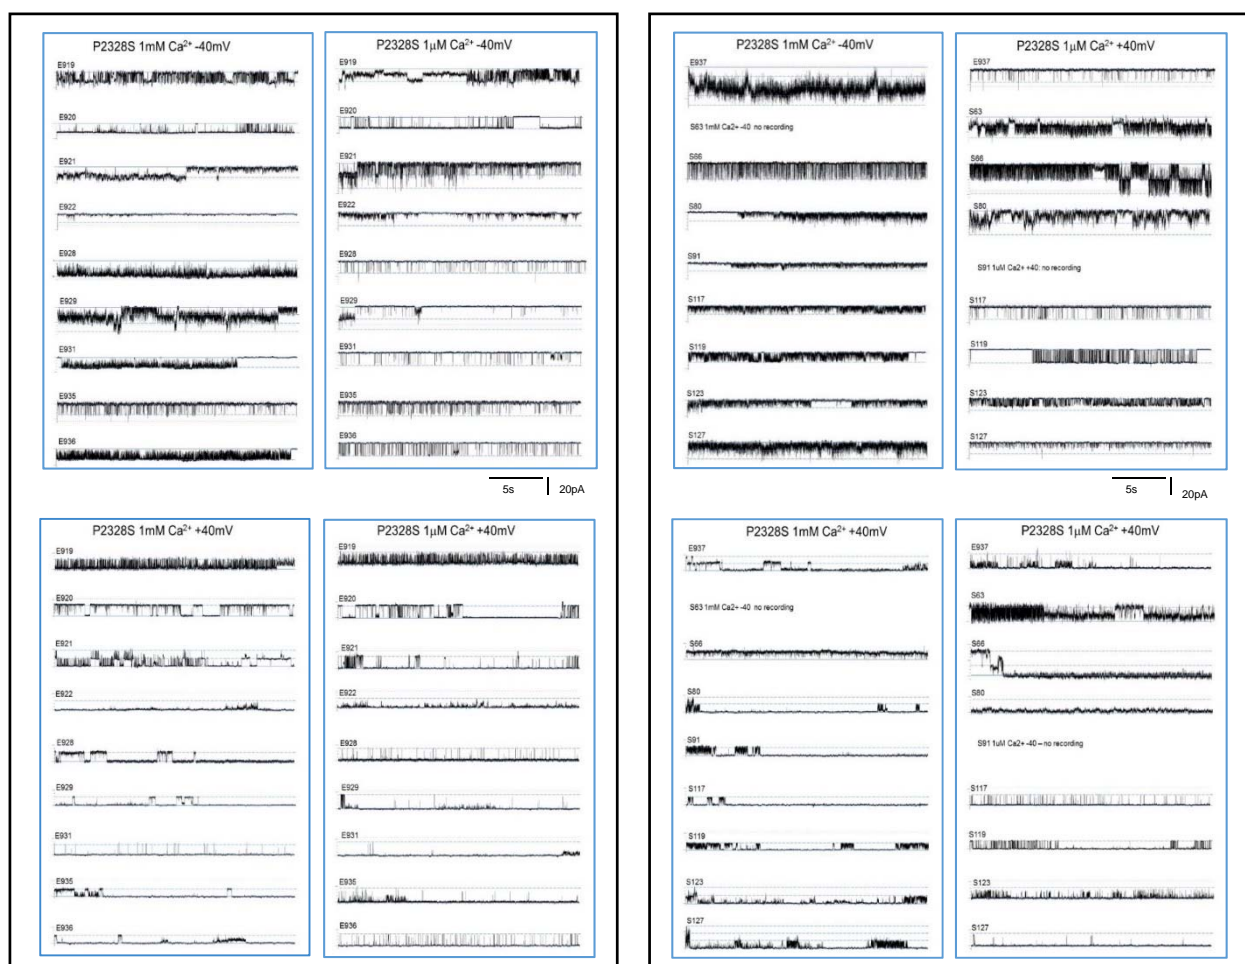

**Figure S4.** Examples of current recordings from 18 P2328S RyR2 channels used for analyses of channel activity with 1 mM and 1  $\mu\text{M}$  cytoplasmic  $\text{Ca}^{2+}$  presented in manuscript Figures 1 to 6. In each panel, records from the same channel are aligned horizontally to allow direct comparisons of the channel activity under each condition. Currents shown on the left hand side of each panel were recorded with 1 mM cytoplasmic  $\text{Ca}^{2+}$ , while those on the right hand side were recorded with 1  $\mu\text{M}$  cytoplasmic  $\text{Ca}^{2+}$ . Currents shown on the top half of each panel were recorded at -40 mV, while those in the lower half were recorded at +40 mV.
